# Supplementary material for: Assessment policy of post-traumatic stress disorder in aviation and its practical application using turbulence-triggered trauma as an example
Source: Frontiers journal article supplement (doi:10.3389/fpubh.2025.1505004), 2025-03-18
Supplement: Data_Sheet_1.pdf [file Data_Sheet_1.pdf]

## Appendix 1. DSM-5 PTSD Diagnostic Criteria (17)

---

### DSM-5 based PTSD Diagnostic Criteria

---

Exposure to serious injury, actual or threatened death

Intrusions, Avoidance, Changes in cognition and mood, Arousal and reactivity

Duration over 1 month

Significant distress or functional impairment

Event caused physiological effects (f. ex. not due to medication)

---
